# Supplementary material for: A Personalized 3D-Printed Model for Obtaining Informed Consent Process for Thyroid Surgery: A Randomized Clinical Study Using a Deep Learning Approach with Mesh-Type 3D Modeling
Source: MDPI journal article supplement (doi:10.3390/jpm11060574), 2021-06-18
Supplement: s1 [file s1]

## Supplementary videos

**Video S1.** The process of our application for deep learning segmentation, modification, marking of thyroid nodules, and exporting the model to mesh-type 3D modeling data.

**Video S2.** Loading of 3D modeling data and its export to a Standard Template Library (STL) file using commercially available 3D modeling software.

## Supplementary Figures

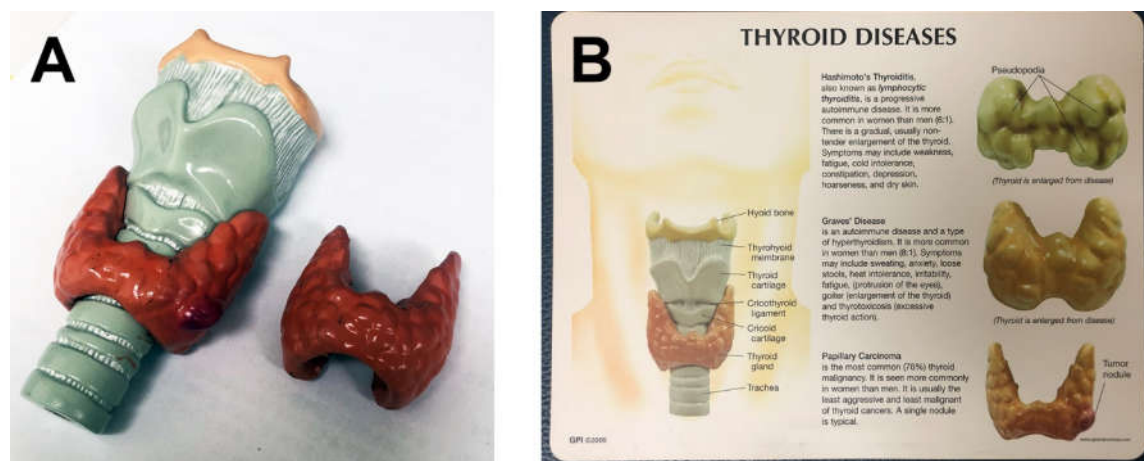

**Figure S1.** Standardized anatomical models (A) and an illustration of the thyroid anatomy (B).

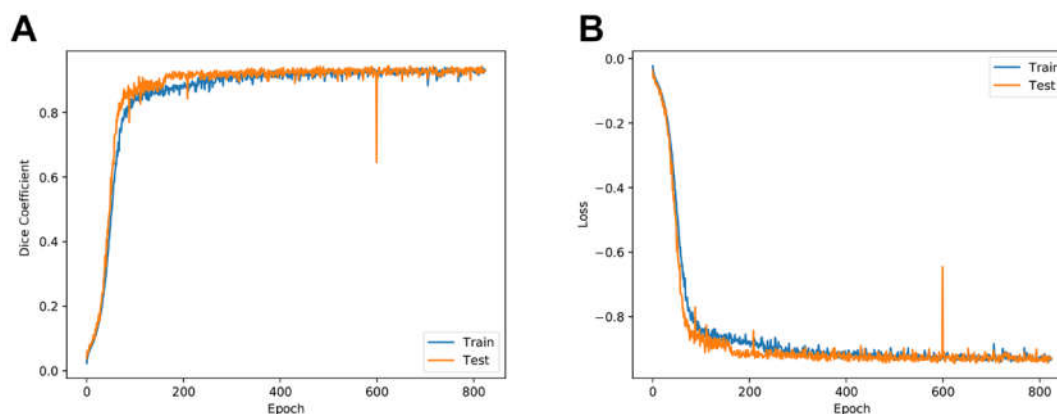

**Figure S2.** Change in the Dice similarity coefficient (DSC) according to deep learning model training (A) and change of loss value defined as  $-1 * DSC$  (B).

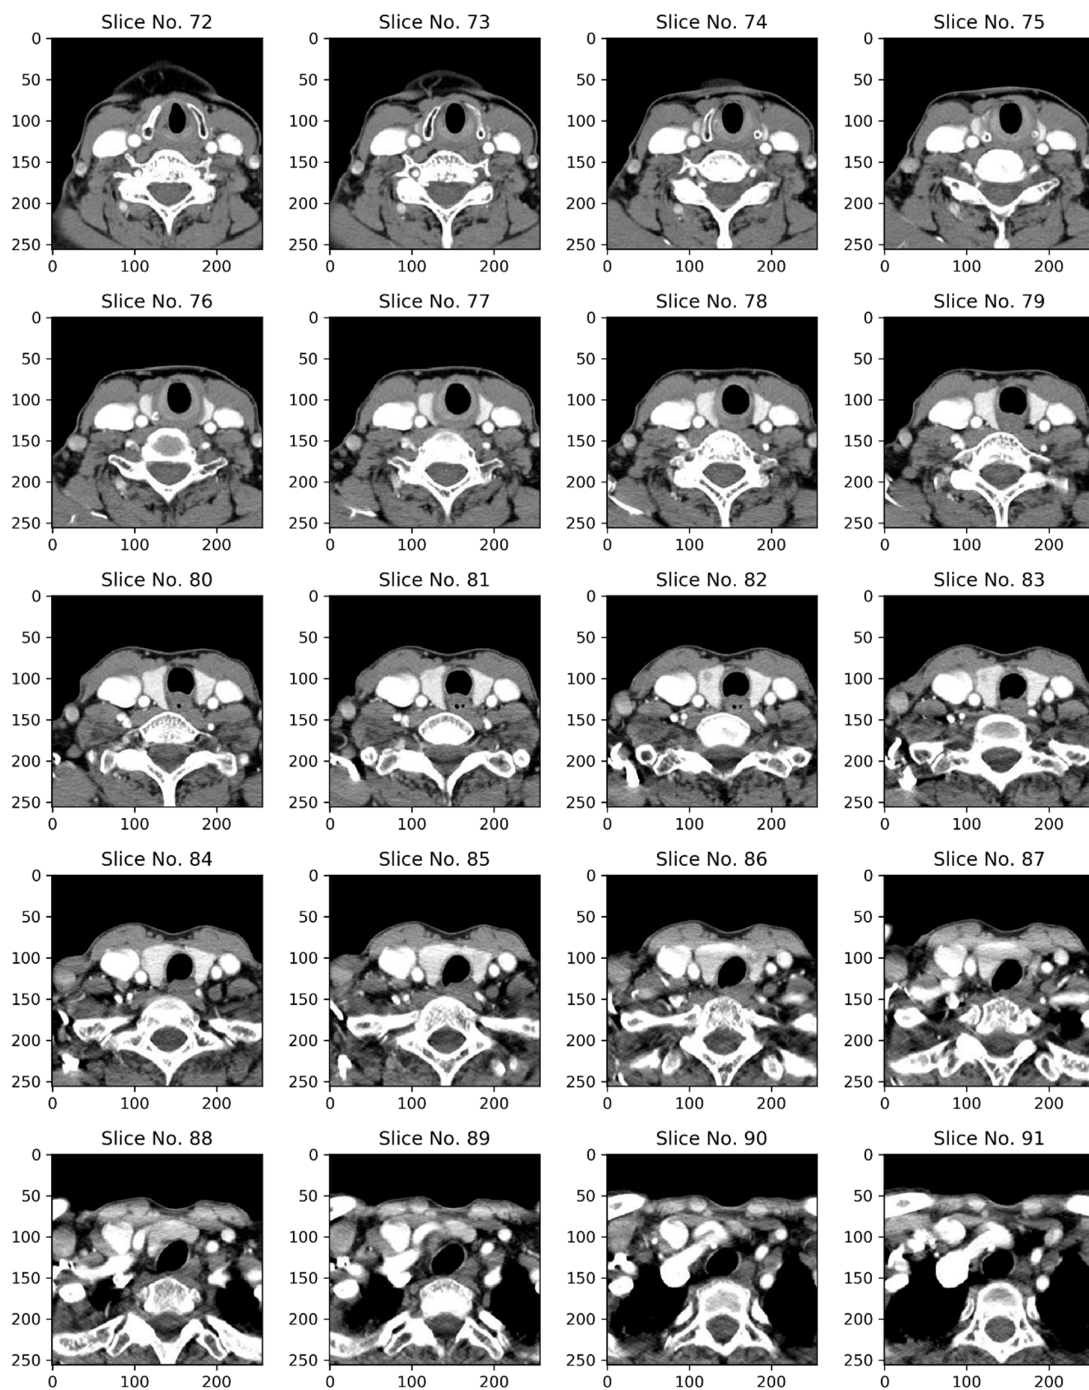

**Figure S3.** Original Thyroid CT images (slices 72 to 91) for patient S004.

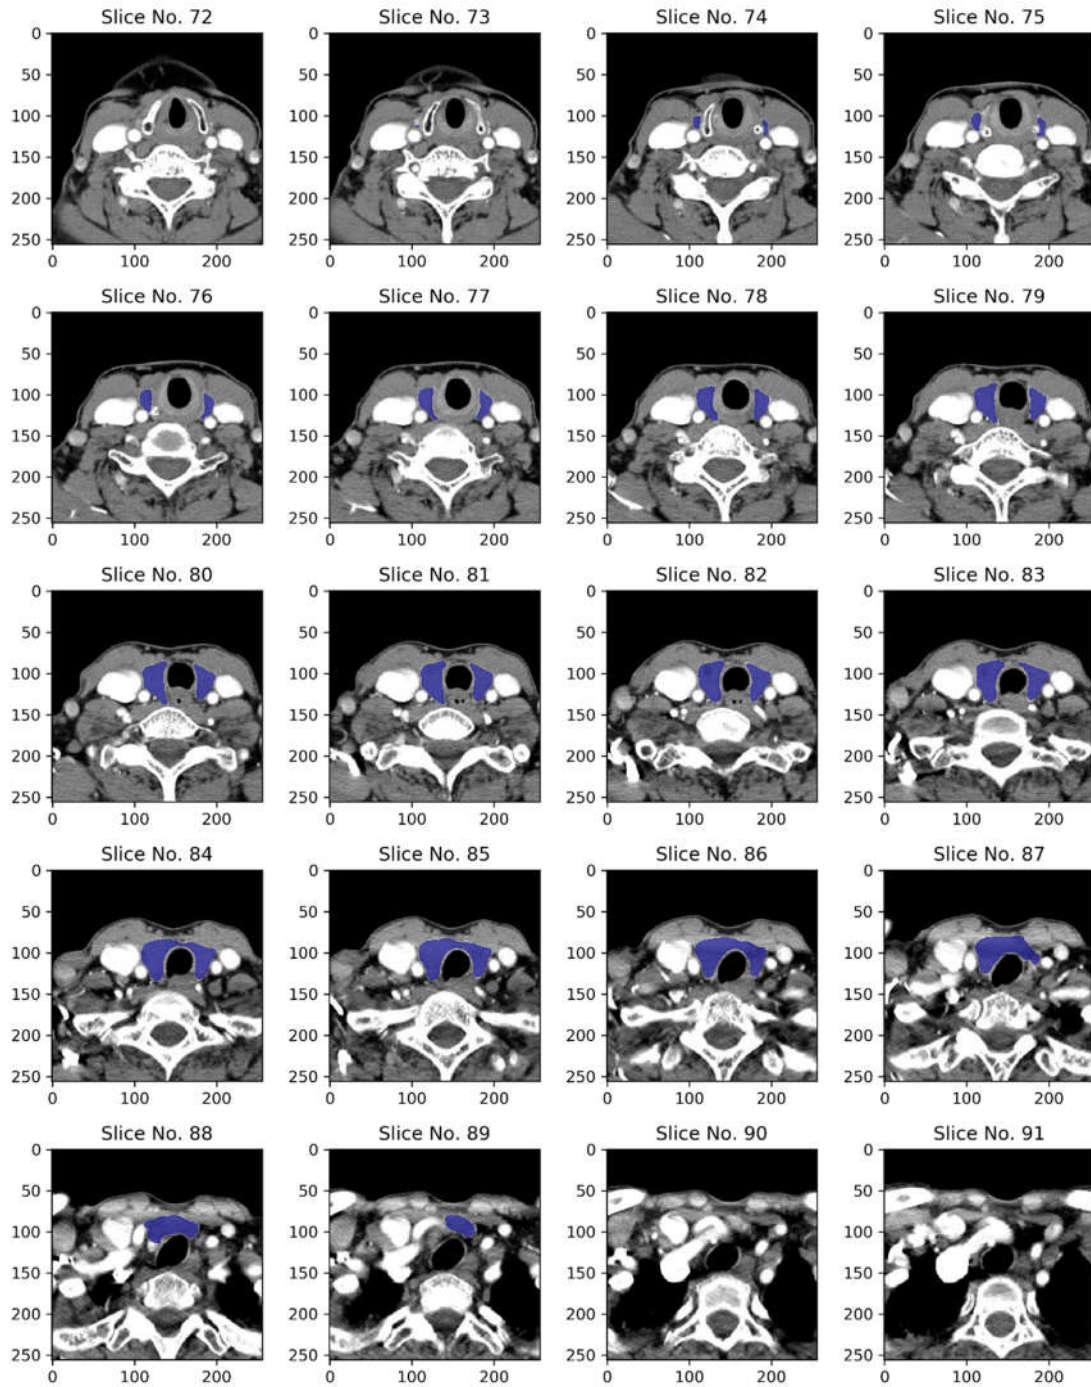

**Figure S4.** Segmentation results for the CT slices of patient S004. The blue mask is the area segmented by the deep learning model. The Dice similarity coefficient was 1.000 and required no correction. Segmentation was successfully achieved in slices where the thyroid gland was observed.

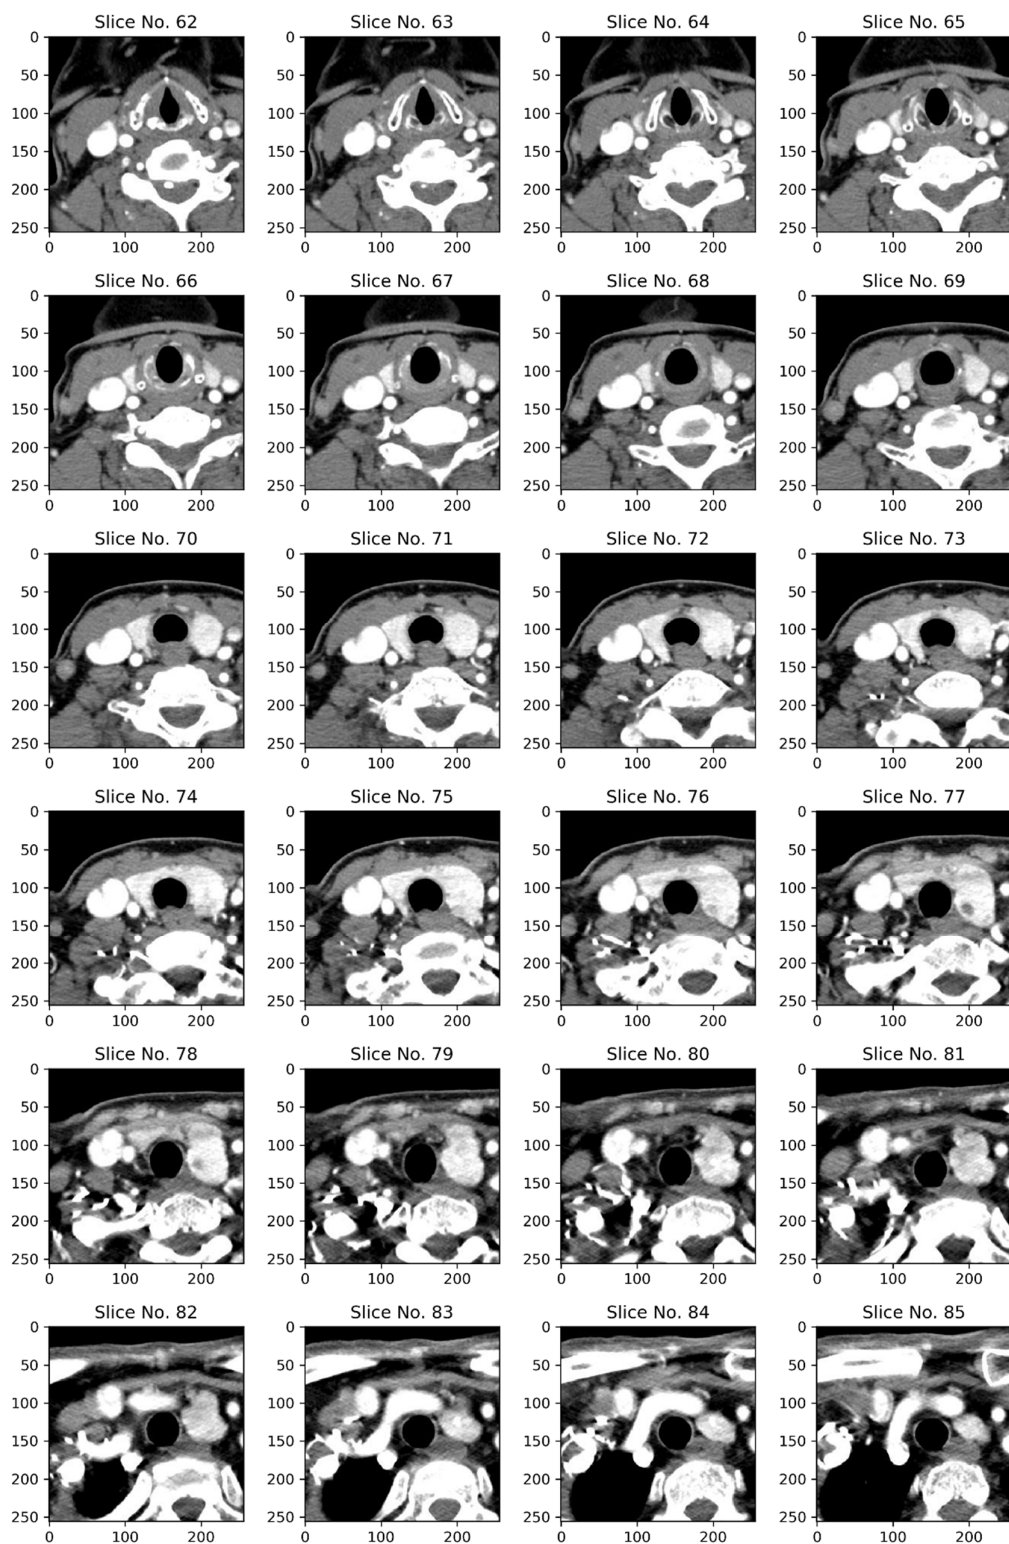

**Figure S5.** Original Thyroid CT images (slices 62 to 85) for patient S007. The patient has an enlarged left thyroid.

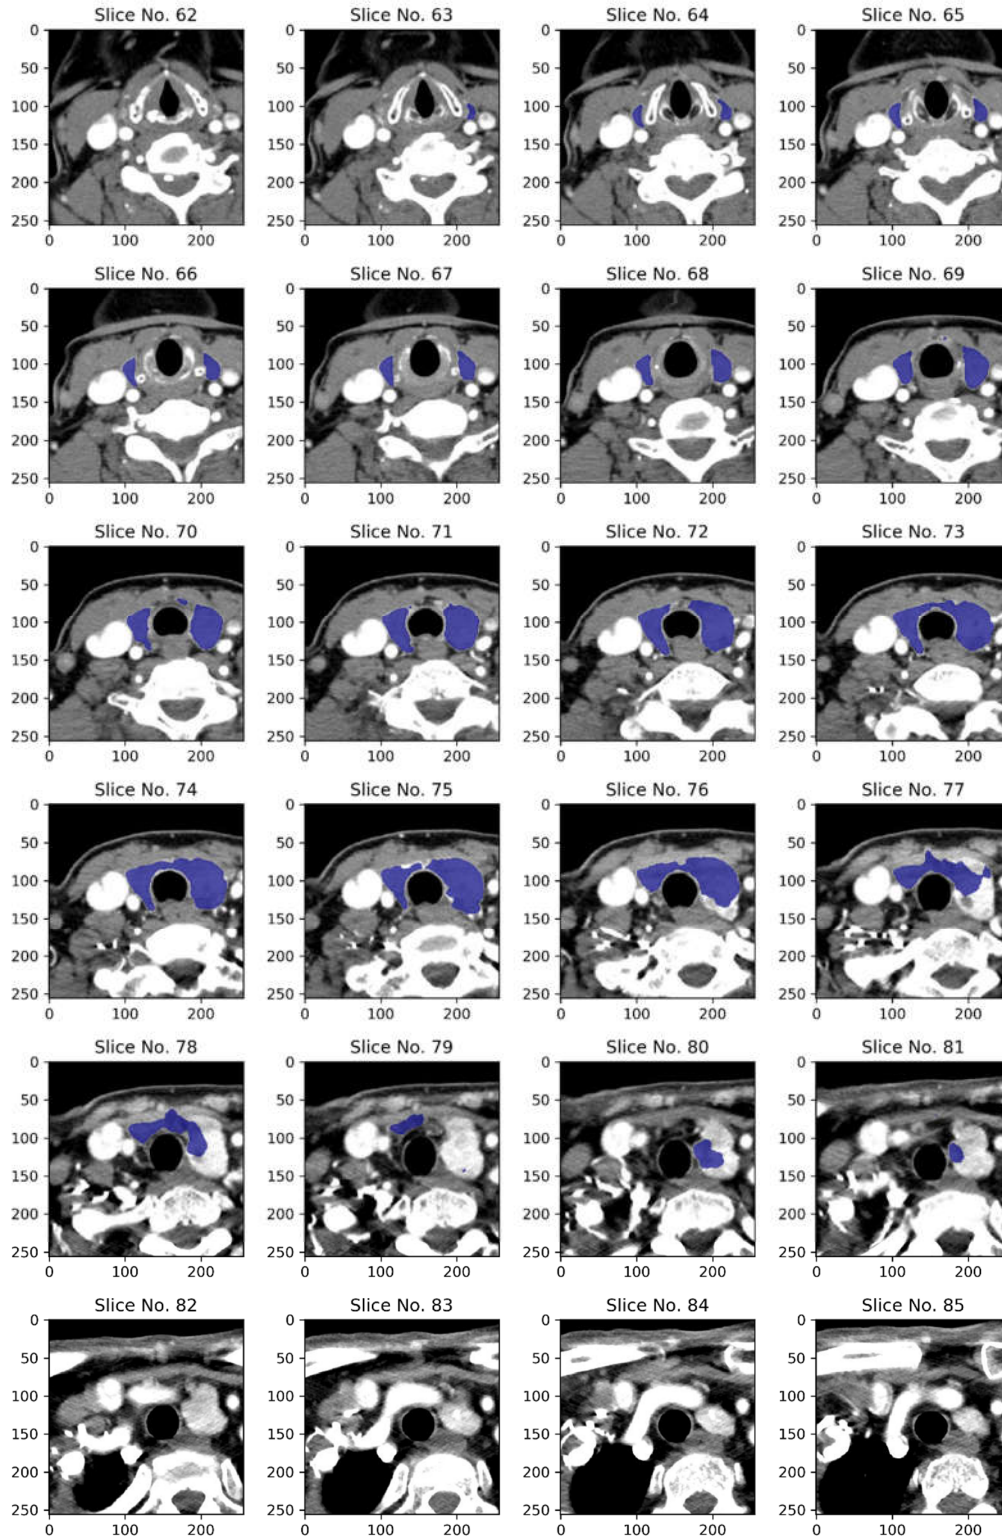

**Figure S6.** Segmentation results for the CT slices of patient S007. The blue mask is the area segmented by the deep learning model. The Dice similarity coefficient was 0.790 and recorded the lowest accuracy. From 76<sup>th</sup> slide, the goitrous left thyroid lobe was not completely segmented.

## Supplementary Tables

**Table S1.** Social status and medical history of the enrolled patients (n = 53)

|                                                           |             |
|-----------------------------------------------------------|-------------|
| Cohabitation status                                       |             |
| Cohabitant                                                | 45 (84.9%)  |
| Alone                                                     | 8 (15.1%)   |
| Education                                                 |             |
| University or higher graduate                             | 28 (52.8%)  |
| Secondary school or lower graduate                        | 25 (47.2%)  |
| Employment                                                |             |
| Employed                                                  | 35 (66.0%)  |
| Unemployed                                                | 17 (32.1%)  |
| Full-time student                                         | 1 (1.9%)    |
| Observe religion                                          |             |
| Yes                                                       | 21 (39.6%)  |
| No                                                        | 32 (60.4%)  |
| Smoking                                                   |             |
| Active                                                    | 1 (1.9%)    |
| Ex-smoker                                                 | 6 (11.3%)   |
| Never                                                     | 46 (86.8%)  |
| Physical status                                           |             |
| ASA $\leq 2$                                              | 53 (100.0%) |
| ASA $\geq 3$                                              | 0 (0.0%)    |
| Family history of thyroid cancer                          |             |
| Yes                                                       | 6 (11.3%)   |
| No                                                        | 47 (88.7%)  |
| Previous surgery, including surgery with local anesthesia |             |
| Yes                                                       | 36 (69.8%)  |
| No                                                        | 17 (30.2%)  |



**Table S3.** Detailed results of the first questionnaire

|                                                                                                                                                                       | <b>With 3D-printed<br/>model group<br/>(n = 28)</b> | <b>With conventional<br/>method group<br/>(n = 25)</b> | <b><i>p</i>*</b> |
|-----------------------------------------------------------------------------------------------------------------------------------------------------------------------|-----------------------------------------------------|--------------------------------------------------------|------------------|
| <b>General Knowledge</b>                                                                                                                                              |                                                     |                                                        |                  |
| 1. I understand the location and size of thyroid lesion that will be surgically resected                                                                              | 4.6 ± 0.6                                           | 4.3 ± 0.6                                              | 0.095            |
| 2. I understand the disease status of the thyroid lesion(s) (malignant/benign)                                                                                        | 4.8 ± 0.4                                           | 4.3 ± 0.6                                              | 0.002            |
| 3. I understand the surgical procedure that will be performed                                                                                                         | 4.7 ± 0.5                                           | 4.2 ± 0.7                                              | 0.007            |
| <b>Benefit</b>                                                                                                                                                        |                                                     |                                                        |                  |
| 4. I understand the purpose of the surgery                                                                                                                            | 4.6 ± 0.6                                           | 4.5 ± 0.5                                              | 0.234            |
| 5. I understand the extent of the surgery and its rationale                                                                                                           | 4.8 ± 0.4                                           | 4.4 ± 0.6                                              | 0.004            |
| 6. I understand the expected survival and recurrence rates after treatment                                                                                            | 4.6 ± 0.6                                           | 4.2 ± 0.7                                              | 0.026            |
| <b>Risk</b>                                                                                                                                                           |                                                     |                                                        |                  |
| 7. I understand the potential complications related to the surgery                                                                                                    | 4.5 ± 0.6                                           | 4.0 ± 0.6                                              | 0.006            |
| 8. I understand the possibility of a delayed discharge from the hospital due to complications or the need for additional treatment                                    | 4.4 ± 0.7                                           | 4.3 ± 0.6                                              | 0.332            |
| 9. I understand that the potential complications may vary depending on the location and size of the lesion in relation to recurrent laryngeal nerve and blood vessels | 4.5 ± 0.6                                           | 4.1 ± 0.6                                              | 0.018            |
| <b>Satisfaction</b>                                                                                                                                                   |                                                     |                                                        |                  |
| 10. I am sufficiently informed about the surgery and satisfied with the explanation                                                                                   | 4.7 ± 0.4                                           | 4.5 ± 0.5                                              | 0.057            |
| 11. I am satisfied with my decision and the medical staff                                                                                                             | 4.7 ± 0.6                                           | 4.5 ± 0.5                                              | 0.142            |
| 12. I am satisfied with my understanding of the disease                                                                                                               | 4.8 ± 0.4                                           | 4.4 ± 0.5                                              | 0.014            |

\*, Wilcoxon rank sum test
